# Supplementary material for: Culture-Independent Quantification of Legionella pneumophila in Evaporative Cooling Systems Using Immunomagnetic Separation Coupled with Flow Cytometry
Source: MDPI journal article supplement (doi:10.3390/applmicrobiol4010019), 2024-01-27
Supplement: s1 [file s1]

## Supporting information

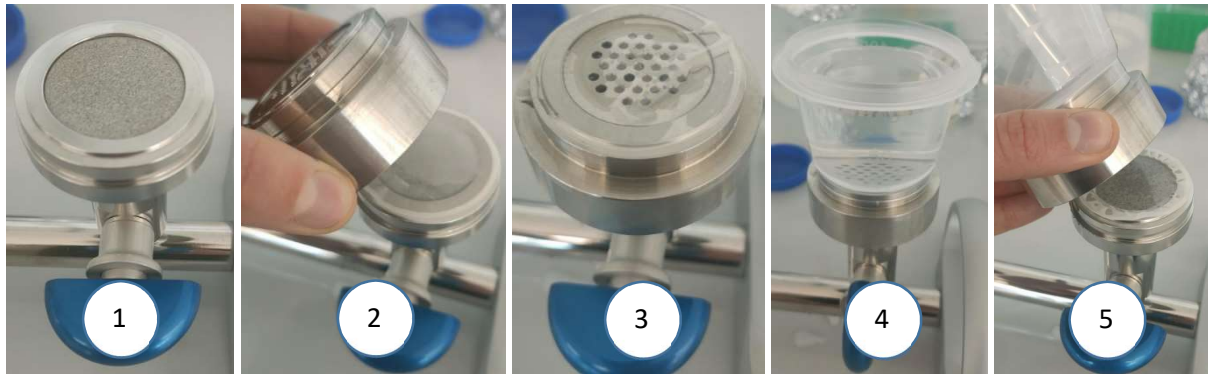

**Figure S1. Schematic set-up of the membrane filtration.** 1) Drawing up the grid and placing the filter with 0.22  $\mu\text{m}$  pore size on top. 2) Putting the pre-filtration adapter unit on top with its corresponding grid. 3) Placing the filter with 5.0  $\mu\text{m}$  pore size. 4) Attaching the sample cup and adding the sample. 5) After the filtration is completed, the pre-filtration unit is removed and the bacteria can be washed from the membrane filter.

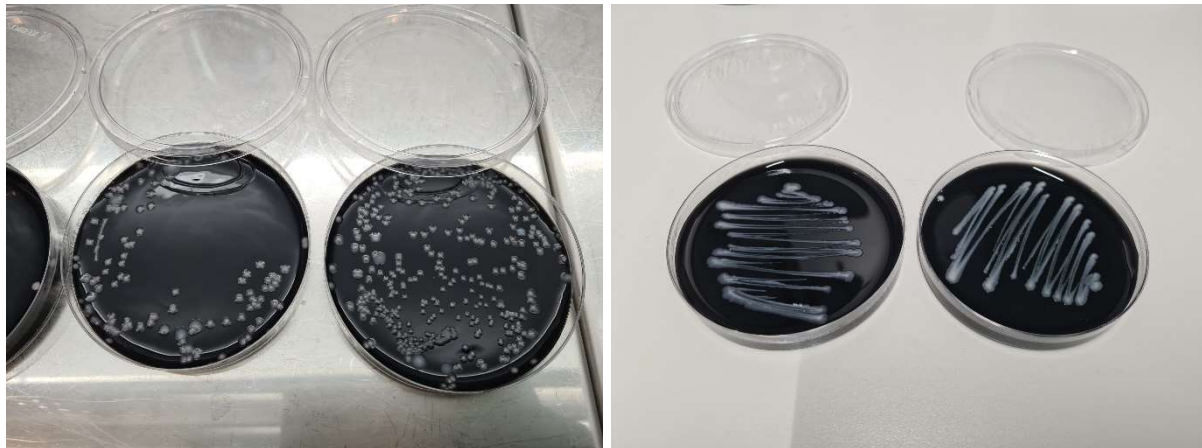

**Figure S2. Results of the cultivation of real samples.** Cultivation of real samples after acidic and heat treatment (left) and stroked suspicious colonies on BCYE agar without cysteine (right).

**Table S1. Summary of the collected and generated data about all ECS samples.**

| <b>Sample Number</b> | <b>Sample Place</b>      | <b>Biocide and concentration</b> | <b>Corrosion inhibitor</b> | <b>Sampling temperature</b> | <b>IMS-FCM (cells/100 mL)</b> | <b>Level of excess</b>  |
|----------------------|--------------------------|----------------------------------|----------------------------|-----------------------------|-------------------------------|-------------------------|
| 1.1.                 | Disinfected sample valve | Moracid 506<br>150 ppm           | Coragard<br>OS 406         | 23.5 °C                     | 36,447                        | >10,000<br>cells/100 mL |
| 1.2.                 | Disinfected sample valve | Moracid 506<br>150 ppm           | Coragard<br>OS 406         | 23.5 °C                     | 8,003                         |                         |
| 2.1.                 | Disinfected sample valve | Moracid 506<br>150 ppm           | Coragard<br>OS 406         | 29.5 °C                     | 14,585                        | >10,000<br>cells/100 mL |
| 2.2.                 | Disinfected sample valve | Moracid 506<br>150 ppm           | Coragard<br>OS 406         | 29.5 °C                     | 16,428                        |                         |
| 3.1.                 | Disinfected sample valve | Moracid 506<br>150 ppm           | Coragard<br>OS 406         | 19.5 °C                     | 20,435                        | >10,000<br>cells/100 mL |
| 3.2.                 | Disinfected sample valve | Moracid 506<br>150 ppm           | Coragard<br>OS 406         | 19.5 °C                     | 22,139                        |                         |
| 4.1.                 | Disinfected sample valve | Moracid 506<br>150 ppm           | Coragard<br>OS 406         | 28.9 °C                     | 11,383                        | >10,000<br>cells/100 mL |
| 4.2.                 | Disinfected sample valve | Moracid 506<br>150 ppm           | Coragard<br>OS 406         | 28.9 °C                     | 13,203                        |                         |
| 5.1                  | Unknown                  | Moracid 550<br>Con. unknown      | Coragard OS 586<br>IW      | 28.5 °C                     | 1,565                         | >1,000<br>cells/100 mL  |
| 5.2.                 | Unknown                  | Moracid 550<br>Con. unknown      | Coragard OS 586<br>IW      | 28.5 °C                     | 2,364                         |                         |
| 6.1.                 | Unknown                  | Nades 2.0<br>Conc. unknown       | Coragard OS 586<br>IW      | 30.4 °C                     | 67                            | >100<br>cells/100 mL    |
| 6.2.                 | Unknown                  | Nades 2.0<br>Conc. unknown       | Coragard OS 586<br>IW      | 30.4 °C                     | 261                           |                         |
| 7.1.                 | Unknown                  | Ac.Bion 331<br>70 ppm            | Bayroquest<br>T400         | 19.4 °C                     | 849                           | >100<br>cells/100 mL    |
| 7.2.                 | Unknown                  | Ac.Bion 331                      | Bayroquest                 | 19.4 °C                     | 816                           |                         |

|       |                             |                             |                       |         |                   |                         |
|-------|-----------------------------|-----------------------------|-----------------------|---------|-------------------|-------------------------|
|       |                             | 70 ppm                      | T400                  |         |                   |                         |
| 8.1.  | Unknown                     | Ac.Bion 331<br>70 ppm       | Bayroquest<br>T400    | 20.4 °C | 660               | >1,000<br>cells/100 mL  |
| 8.2.  | Unknown                     | Ac.Bion 331<br>70 ppm       | Bayroquest<br>T400    | 20.4 °C | 1,182             |                         |
| 9.1.  | Sample valve                | Moracid 120<br>Con. unknown | Coragard OS 586<br>IW | 23.2 °C | Clogged cartridge | >1,000<br>cells/100 mL  |
| 9.2.  | Sample valve                | Moracid 120<br>Con. unknown | Coragard OS 586<br>IW | 23.2 °C | 1,210             |                         |
| 10.1. | Sample valve                | Moracid 120<br>Con. unknown | Coragard OS 586<br>IW | 25.4 °C | 0                 | < LoQ                   |
| 10.2. | Sample valve                | Moracid 120<br>Con. unknown | Coragard OS 586<br>IW | 25.4 °C | 0                 |                         |
| 11.1. | Disinfected sample<br>valve | Moracid 506<br>150 ppm      | Coragard<br>OS 406    | 20.3 °C | 30,764            | >10,000<br>cells/100 mL |
| 11.2. | Disinfected sample<br>valve | Moracid 506<br>150 ppm      | Coragard<br>OS 406    | 20.3 °C | 41,153            |                         |
| 12.1. | Disinfected sample<br>valve | Moracid 506<br>150 ppm      | Coragard<br>OS 406    | 26.9 °C | Clogged cartridge | >1,000<br>cells/100 mL  |
| 12.2. | Disinfected sample<br>valve | Moracid 506<br>150 ppm      | Coragard<br>OS 406    | 26.9 °C | 3,102             |                         |
| 13.1. | Disinfected sample<br>valve | Moracid 506<br>150 ppm      | Coragard<br>OS 406    | 19.3 °C | 22,394            | >10,000<br>cells/100 mL |
| 13.2. | Disinfected sample<br>valve | Moracid 506<br>150 ppm      | Coragard<br>OS 406    | 19.3 °C | 15,601            |                         |
| 14.1. | Disinfected sample<br>valve | Moracid 506<br>150 ppm      | Coragard<br>OS 406    | 27.3 °C | 21,701            | >10,000<br>cells/100 mL |
| 14.2. | Disinfected sample<br>valve | Moracid 506<br>150 ppm      | Coragard<br>OS 406    | 27.3 °C | 11,350            |                         |
| 15.1. | Unknown                     | Moracid 560                 | Coragard              | 24.7 °C | 0                 | < LoQ                   |

|       |                             |                              |                       |         |        |                         |
|-------|-----------------------------|------------------------------|-----------------------|---------|--------|-------------------------|
|       |                             | Con. unknown                 | OS 586 IW             |         |        |                         |
| 15.2. | Unknown                     | Moracid 560<br>Con. unknown  | Coragard<br>OS 586 IW | 24.7 °C | 0      |                         |
| 16.1. | Disinfected sample<br>valve | Moracid 506<br>150 ppm       | Coragard<br>OS 406    | 21.3 °C | 16,389 | >10,000<br>cells/100 mL |
| 16.2. | Disinfected sample<br>valve | Moracid 506<br>150 ppm       | Coragard<br>OS 406    | 21.3 °C | 11,716 |                         |
| 17.1. | Disinfected sample<br>valve | Moracid 506<br>150 ppm       | Coragard<br>OS 406    | 25.9 °C | 26,146 | >10,000<br>cells/100 mL |
| 17.2. | Disinfected sample<br>valve | Moracid 506<br>150 ppm       | Coragard<br>OS 406    | 25.9 °C | 20,907 |                         |
| 18.1. | Disinfected sample<br>valve | Moracid 506<br>150 ppm       | Coragard<br>OS 406    | 19.7 °C | 27,656 | >10,000<br>cells/100 mL |
| 18.2. | Disinfected sample<br>valve | Moracid 506<br>150 ppm       | Coragard<br>OS 406    | 19.7 °C | 22,999 |                         |
| 19.1. | Disinfected sample<br>valve | Moracid 506<br>150 ppm       | Coragard<br>OS 406    | 24.5 °C | 70,191 | >10,000<br>cells/100 mL |
| 19.2. | Disinfected sample<br>valve | Moracid 506<br>150 ppm       | Coragard<br>OS 406    | 24.5 °C | 78,111 |                         |
| 20.1. | Disinfected sample<br>valve | Moracid 506<br>150 ppm       | Coragard<br>OS 406    | 20,0 °C | 19,075 | >10,000<br>cells/100 mL |
| 20.2. | Disinfected sample<br>valve | Moracid 506<br>150 ppm       | Coragard<br>OS 406    | 20,0 °C | 17,849 |                         |
| 21.1. | Disinfected sample<br>valve | Moracid 506<br>150 ppm       | Coragard<br>OS 406    | 29.3 °C | 25,225 | >10,000<br>cells/100 mL |
| 21.2. | Disinfected sample<br>valve | Moracid 506<br>150 ppm       | Coragard<br>OS 406    | 29.3 °C | 74,303 |                         |
| 22.1. | Droplet basin               | ST-DOS B589<br>Conc. unknown | ST-DOS<br>K-310       | 17.7 °C | 15,573 | >10,000<br>cells/100 mL |
| 22.2. | Droplet basin               | ST-DOS B589                  | ST-DOS                | 17.7 °C | 13,043 |                         |

|       |                             |                              |                 |         |       |                        |
|-------|-----------------------------|------------------------------|-----------------|---------|-------|------------------------|
|       |                             | Conc. unknown                | K-310           |         |       |                        |
| 23.1. | Droplet basin               | ST-DOS B589<br>Conc. unknown | ST-DOS<br>K-310 | 18.8 °C | 1,615 | >1,000<br>cells/100 mL |
| 23.2. | Droplet basin               | ST-DOS B589<br>Conc. unknown | ST-DOS<br>K-310 | 18.8 °C | 6,255 |                        |
| 24.1. | Droplet basin               | ST-DOS B589<br>Con. unknown  | ST-DOS<br>K-310 | 31.8 °C | 100   | >100<br>cells/100 mL   |
| 24.2. | Droplet separator<br>basin  | ST-DOS B589<br>Conc. unknown | ST-DOS<br>K-310 | 31.8 °C | 144   |                        |
| 25.1. | Droplet separator<br>basin  | ST-DOS B589<br>Conc. unknown | ST-DOS<br>K-310 | 30.4 °C | 549   | >100<br>cells/100 mL   |
| 25.2. | Droplet separator<br>basin  | ST-DOS B589<br>Conc. unknown | ST-DOS<br>K-310 | 30.4 °C | 67    |                        |
| 26.1. | Disinfected sample<br>valve | ST-DOS B589<br>Conc. unknown | ST-DOS<br>K-310 | 21.9 °C | 194   | >100<br>cells/100 mL   |
| 26.2. | Disinfected sample<br>valve | ST-DOS B589<br>Conc. unknown | ST-DOS<br>K-310 | 21.9 °C | 222   |                        |
